# Supplementary figures and images for: Molecular evolution under increasing transposable element burden in Drosophila: A speed limit on the evolutionary arms race
Source: Springer Nature journal article supplement (doi:10.1186/1471-2148-11-258), 2011-09-14

A)

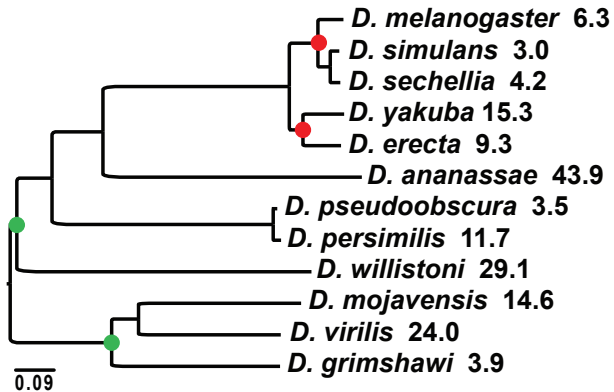

B)

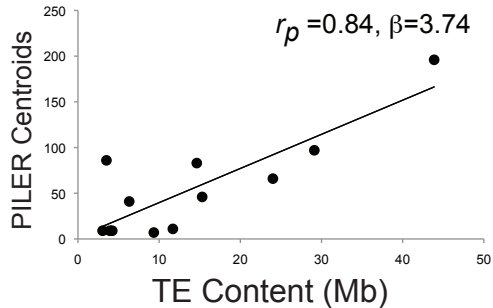

Supplement: 12862_2011_1864_MOESM1_ESM.pdf [file 12862_2011_1864_MOESM1_ESM.pdf]

A) Genome Average

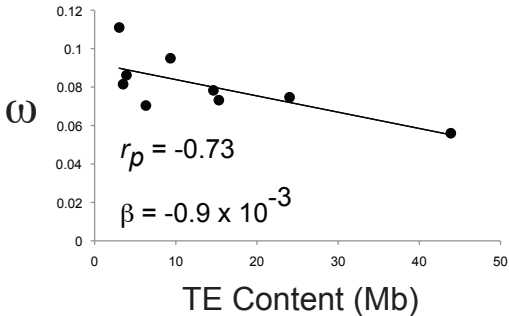

B) Control Genes

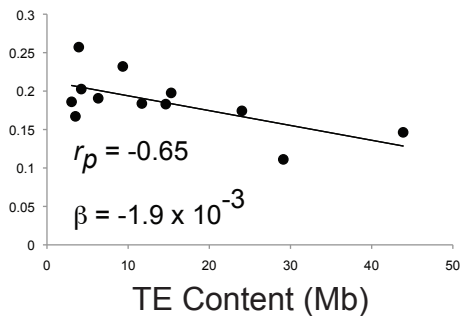

C) piRNA Genes

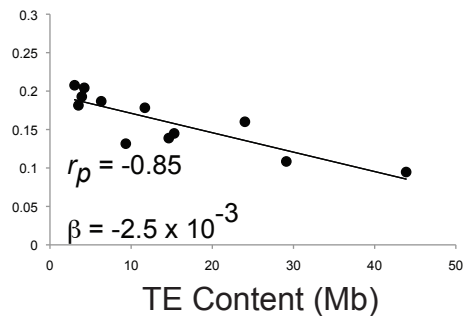

Supplement: 12862_2011_1864_MOESM2_ESM.pdf [file 12862_2011_1864_MOESM2_ESM.pdf]

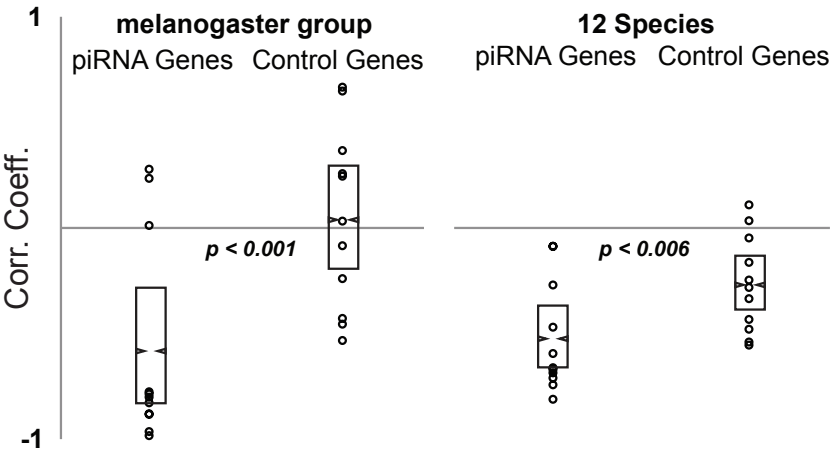

Supplement: 12862_2011_1864_MOESM3_ESM.pdf [file 12862_2011_1864_MOESM3_ESM.pdf]

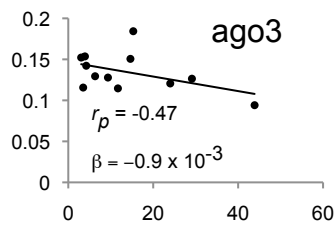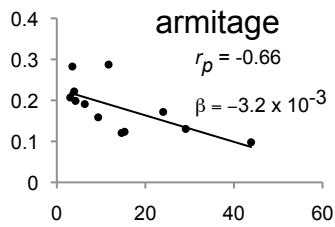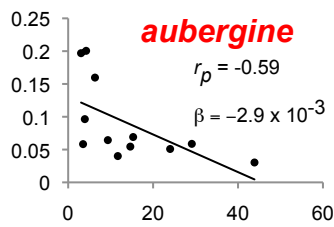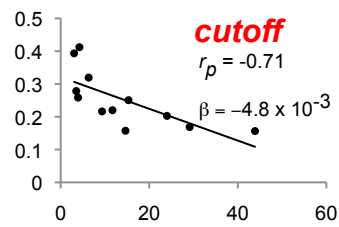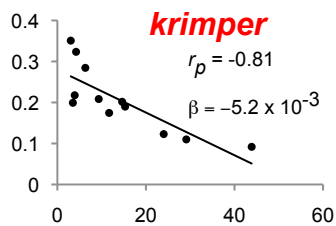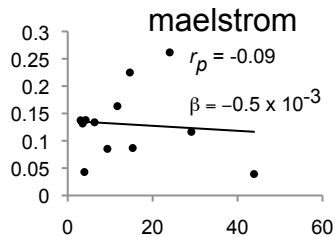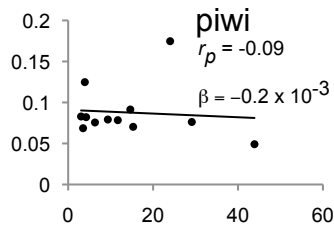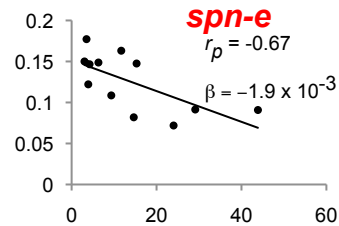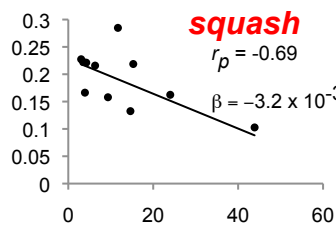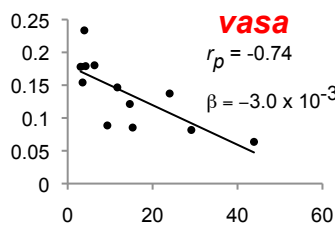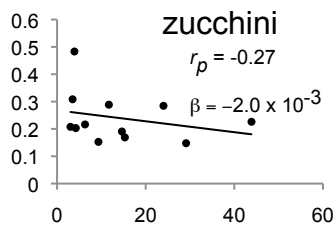

$\omega$

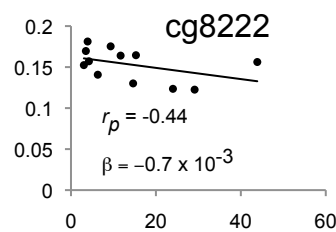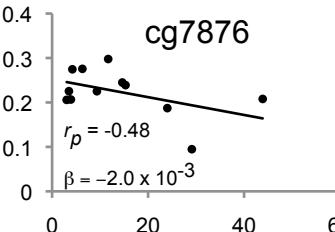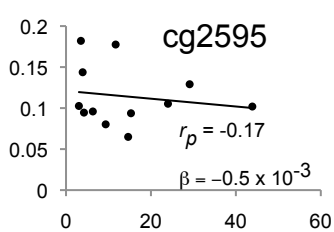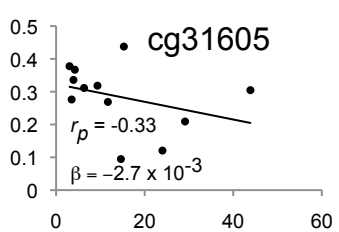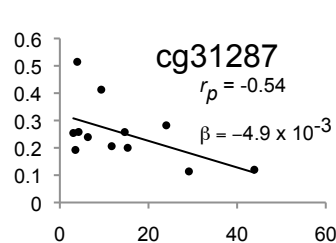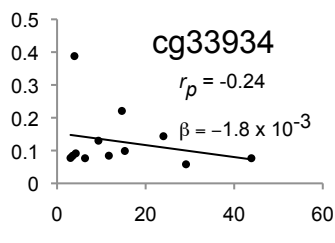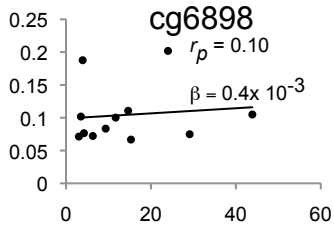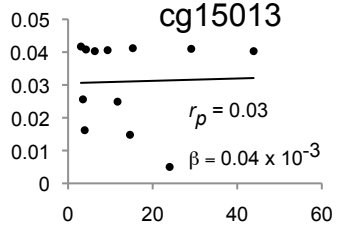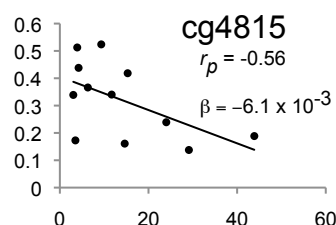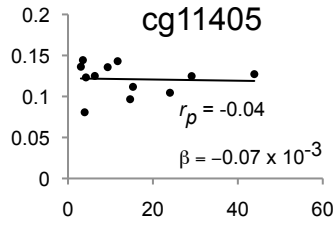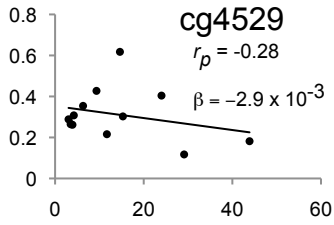

TE Content (Mb)

Supplement: 12862_2011_1864_MOESM4_ESM.pdf [file 12862_2011_1864_MOESM4_ESM.pdf]

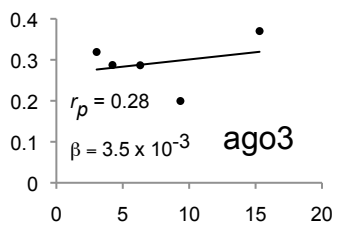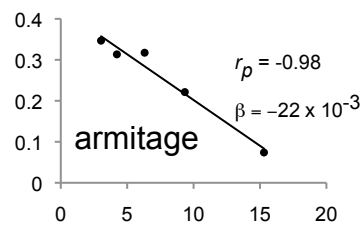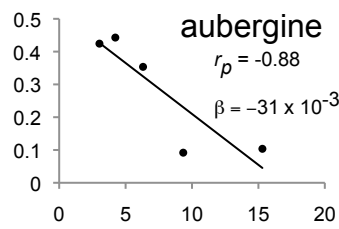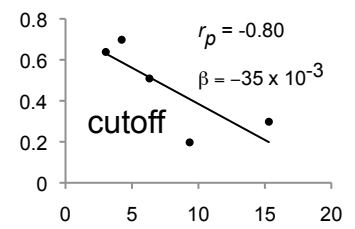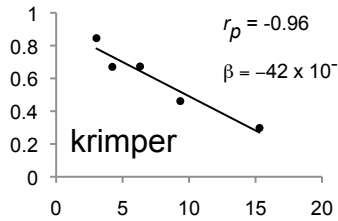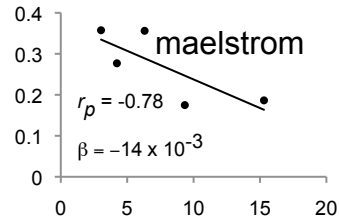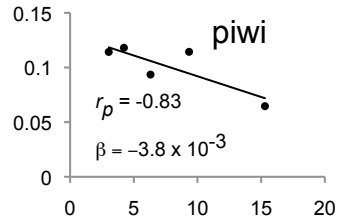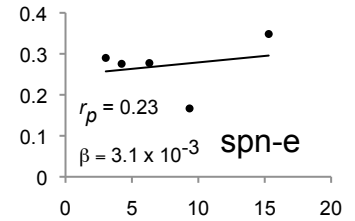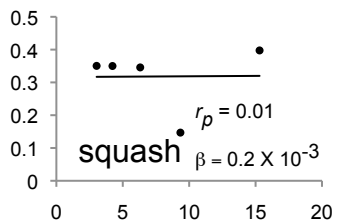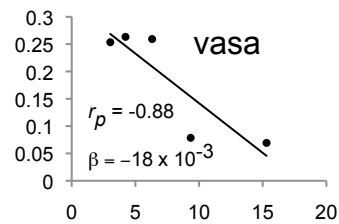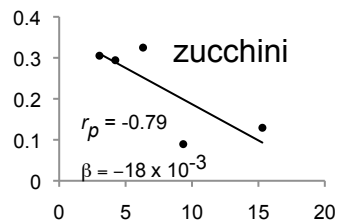

**(O)**

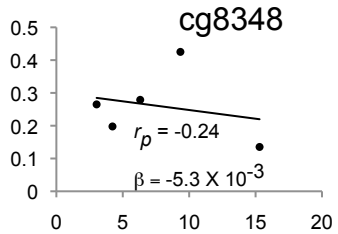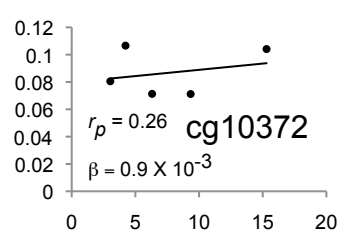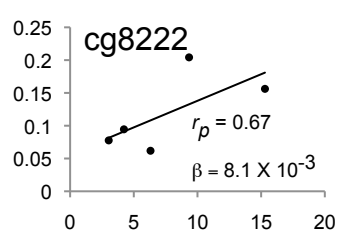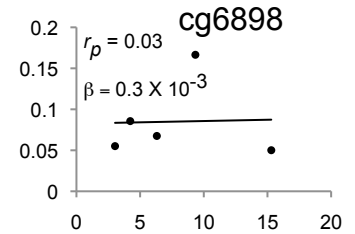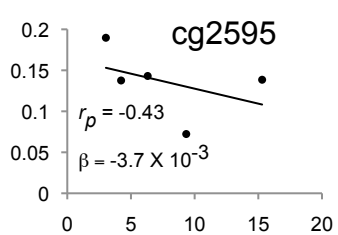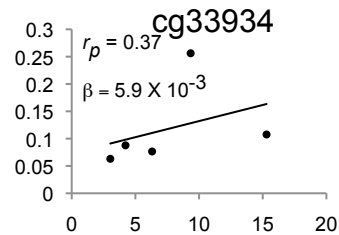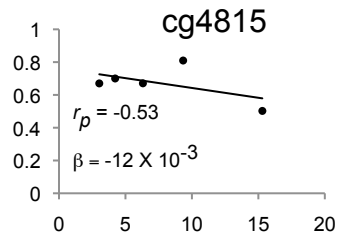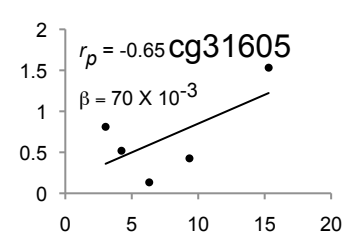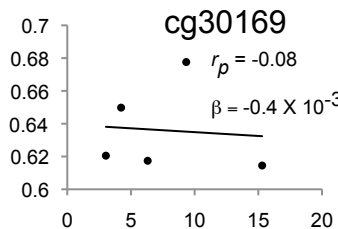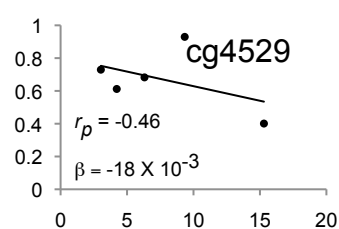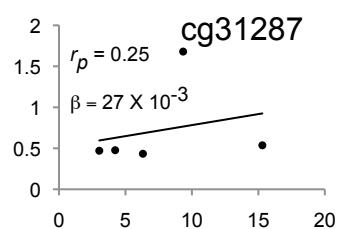

TE Content (Mb)

Supplement: 12862_2011_1864_MOESM5_ESM.pdf [file 12862_2011_1864_MOESM5_ESM.pdf]

A) Genome Average

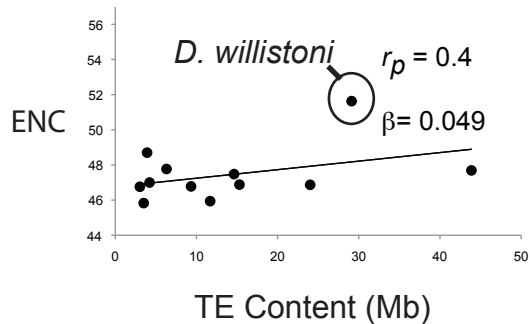

B) Control Genes

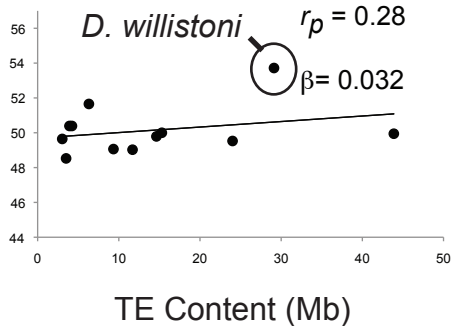

C) piRNA Genes

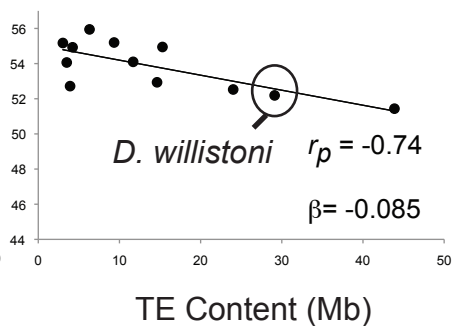

Supplement: 12862_2011_1864_MOESM6_ESM.pdf [file 12862_2011_1864_MOESM6_ESM.pdf]
